# Supplementary material
Source: MDPI journal article supplement (https://www.mdpi.com/2073-445X/12/10/1914)
Supplement: s1 [file s1]

# **Climate change impacts on grassland vigour in northern Portugal**

## **Supplementary material**

Table S1. Autochthonous plants found in grasslands of the C  a Region. Data retrieved from the portal Flora.On (<https://flora-on.pt>).

| Family           | Taxonomy                                                 |
|------------------|----------------------------------------------------------|
| Apiaceae         | <i>Daucus carota</i> subsp. <i>carota</i>                |
| Apiaceae         | <i>Eryngium campestre</i>                                |
| Apiaceae         | <i>Eryngium tenue</i>                                    |
| Apiaceae         | <i>Oenanthe crocata</i>                                  |
| Asparagaceae     | <i>Scilla autumnalis</i>                                 |
| Asteraceae       | <i>Andryala integrifolia</i>                             |
| Asteraceae       | <i>Calendula arvensis</i>                                |
| Asteraceae       | <i>Carlina hispanica</i>                                 |
| Asteraceae       | <i>Carlina racemosa</i>                                  |
| Asteraceae       | <i>Cnicus benedictus</i>                                 |
| Asteraceae       | <i>Coleostephus myconis</i>                              |
| Asteraceae       | <i>Crepis vesicaria</i> subsp. <i>taraxacifolia</i>      |
| Asteraceae       | <i>Leontodon taraxacoides</i> subsp. <i>longirostris</i> |
| Asteraceae       | <i>Onopordum acanthium</i> subsp. <i>acanthium</i>       |
| Asteraceae       | <i>Senecio jacobaea</i>                                  |
| Boraginaceae     | <i>Echium plantagineum</i>                               |
| Brassicaceae     | <i>Brassica barrelieri</i>                               |
| Brassicaceae     | <i>Capsella bursa-pastoris</i>                           |
| Brassicaceae     | <i>Teesdalia nudicaulis</i>                              |
| Campanulaceae    | <i>Campanula lusitanica</i> subsp. <i>lusitanica</i>     |
| Caryophyllaceae  | <i>Herniaria scabrida</i> subsp. <i>scabrida</i>         |
| Caryophyllaceae  | <i>Petrorhagia nanteuillii</i>                           |
| Caryophyllaceae  | <i>Spergula arvensis</i>                                 |
| Caryophyllaceae  | <i>Spergularia purpurea</i>                              |
| Cistaceae        | <i>Helianthemum aegyptiacum</i>                          |
| Cistaceae        | <i>Tuberaria guttata</i>                                 |
| Convolvulaceae   | <i>Convolvulus arvensis</i>                              |
| Crassulaceae     | <i>Sedum andegavense</i>                                 |
| Crassulaceae     | <i>Sedum arenarium</i>                                   |
| Dennstaedtiaceae | <i>Pteridium aquilinum</i> subsp. <i>aquilinum</i>       |
| Euphorbiaceae    | <i>Euphorbia helioscopia</i> subsp. <i>helioscopia</i>   |
| Fabaceae         | <i>Astragalus pelecinus</i> subsp. <i>pelecinus</i>      |
| Fabaceae         | <i>Coronilla repanda</i> subsp. <i>dura</i>              |
| Fabaceae         | <i>Hymenocarpus cornicina</i>                            |
| Fabaceae         | <i>Hymenocarpus lotoides</i>                             |
| Fabaceae         | <i>Lathyrus angulatus</i>                                |
| Fabaceae         | <i>Lotus pedunculatus</i>                                |
| Fabaceae         | <i>Medicago arabica</i>                                  |
| Fabaceae         | <i>Medicago polymorpha</i>                               |
| Fabaceae         | <i>Ornithopus compressus</i>                             |
| Fabaceae         | <i>Trifolium arvense</i> var. <i>arvense</i>             |
| Fabaceae         | <i>Trifolium dubium</i>                                  |
| Fabaceae         | <i>Trifolium cherleri</i>                                |

| <b>Family</b>    | <b>Taxonomy</b>                                 |
|------------------|-------------------------------------------------|
| Fabaceae         | <i>Trifolium repens</i> var. <i>repens</i>      |
| Fabaceae         | <i>Trifolium subterraneum</i>                   |
| Fabaceae         | <i>Vicia disperma</i>                           |
| Geraniaceae      | <i>Erodium botrys</i>                           |
| Hypericaceae     | <i>Hypericum undulatum</i>                      |
| Juncaceae        | <i>Juncus acutiflorus</i>                       |
| Juncaceae        | <i>Juncus conglomeratus</i>                     |
| Juncaceae        | <i>Juncus effusus</i>                           |
| Lamiaceae        | <i>Lamium coutinhoi</i>                         |
| Lamiaceae        | <i>Lamium purpureum</i>                         |
| Lamiaceae        | <i>Marrubium vulgare</i>                        |
| Lamiaceae        | <i>Mentha suaveolens</i>                        |
| Lamiaceae        | <i>Salvia verbenaca</i>                         |
| Lamiaceae        | <i>Stachys arvensis</i>                         |
| Malvaceae        | <i>Malva tournefortiana</i>                     |
| Orobanchaceae    | <i>Bartsia trixago</i>                          |
| Papaveraceae     | <i>Papaver rhoeas</i> subsp. <i>rhoeas</i>      |
| Plantaginaceae   | <i>Anarrhinum bellidifolium</i>                 |
| Plantaginaceae   | <i>Linaria sparteae</i>                         |
| Plantaginaceae   | <i>Plantago coronopus</i>                       |
| Poaceae          | <i>Agrostis castellana</i>                      |
| Poaceae          | <i>Bromus hordeaceus</i>                        |
| Poaceae          | <i>Catapodium rigidum</i> subsp. <i>rigidum</i> |
| Poaceae          | <i>Dactylis glomerata</i>                       |
| Poaceae          | <i>Festuca ampla</i>                            |
| Poaceae          | <i>Festuca arundinacea</i>                      |
| Poaceae          | <i>Festuca rothmaleri</i>                       |
| Poaceae          | <i>Lolium multiflorum</i>                       |
| Poaceae          | <i>Lolium rigidum</i>                           |
| Poaceae          | <i>Lolium perene</i>                            |
| Poaceae          | <i>Poa bulbosa</i>                              |
| Poaceae          | <i>Vulpia myuros</i>                            |
| Primulaceae      | <i>Asterolinon linum-stellatum</i>              |
| Ranunculaceae    | <i>Ranunculus muricatus</i>                     |
| Resedaceae       | <i>Sesamoides purpurascens</i>                  |
| Rubiaceae        | <i>Crucianella angustifolia</i>                 |
| Scrophulariaceae | <i>Verbascum pulverulentum</i>                  |

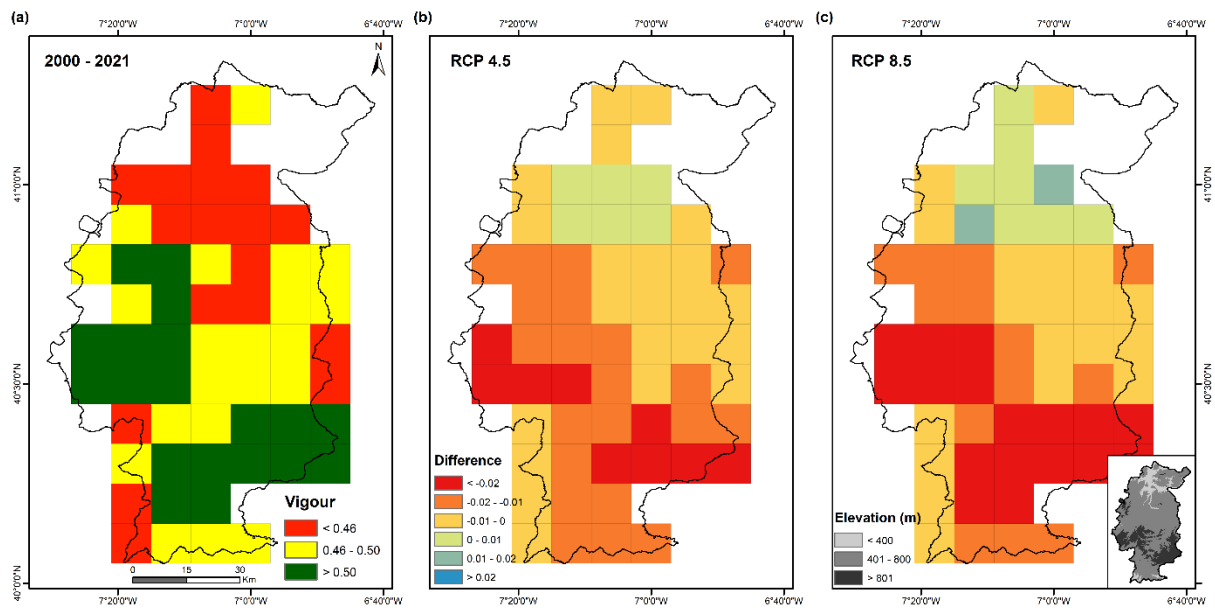

**Figure S1.** Grassland NDVI values in the Côa region for the recent-past (2000–2021) and differences for two anthropogenic radiative forcing scenarios for the long-term future period (2071–2100): present (2000-2021) (a), RCP 4.5 and (b) and RCP 8.5 (c), obtained from the mean of NDVI-values. The elevation is also represented.

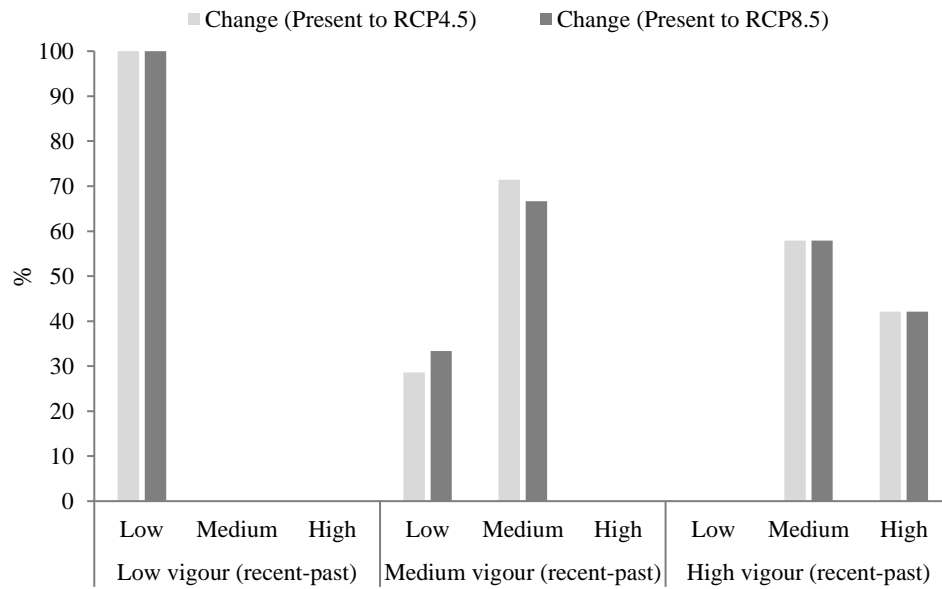

**Figure S2.** Changes in grassland vigour class from the recent-past (2000-2021) to the future period (2071-2100) for RCP4.5 and RCP8.5. The values are percentage representations of the number of pixels that changed or remained in the same vigour class.

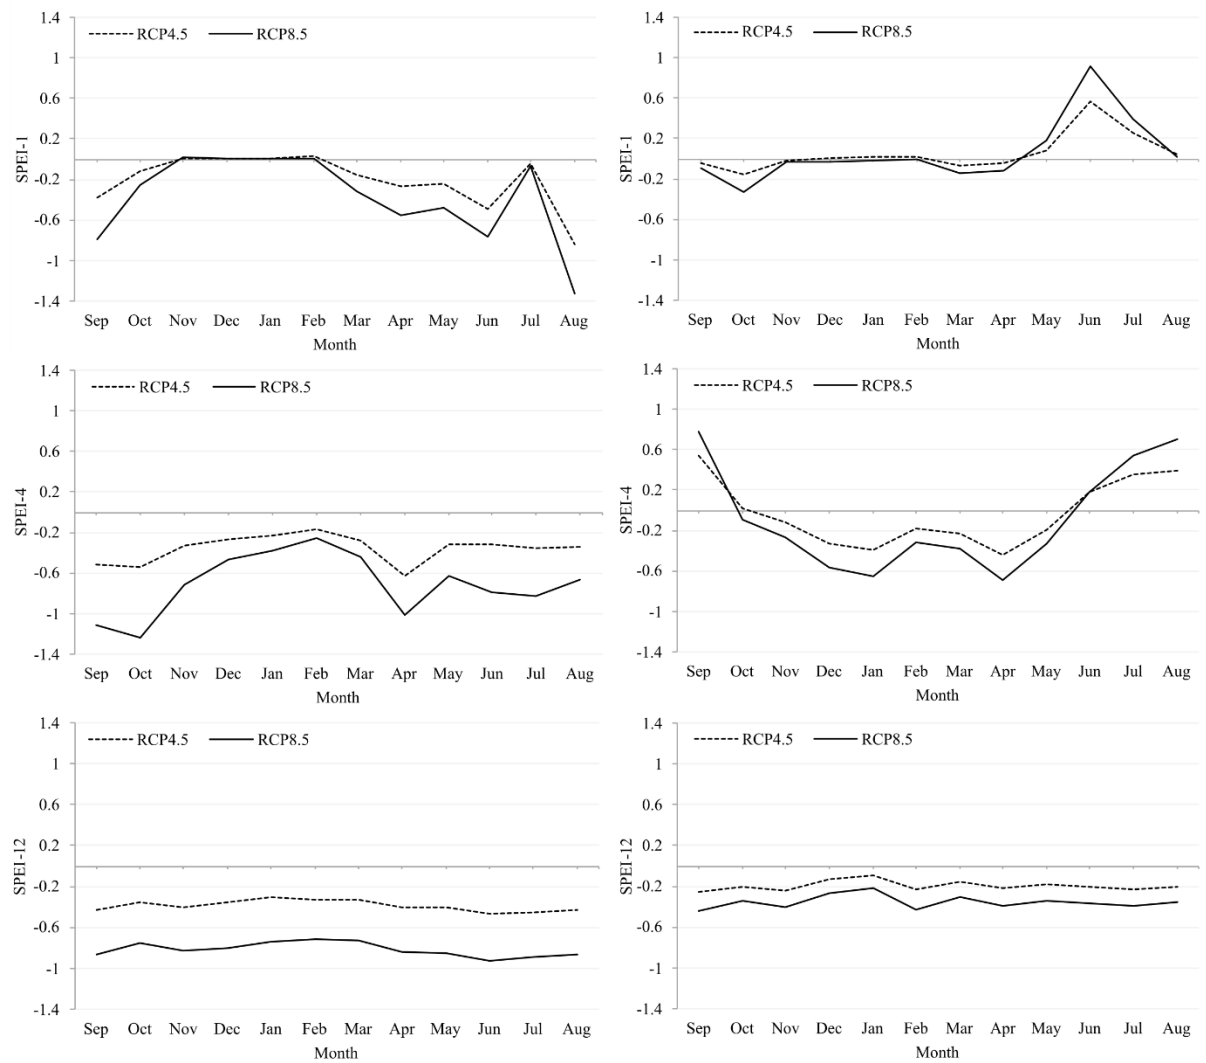

**Figure S3.** The graphs correspond to the sum of the future difference (RCP4.5 and RCP8.5, for the period 2071-2100) of the monthly values of SPEI-1, SPEI-4 and SPEI-12 relative to the current values (2000-2021). The representations were made from data obtained for two distinct regions. The left-side figures (40.1 S and -7.3 E) represent the generalized reduction of SPEI, and the right-side ones (41.2 S and -7.0 E) show a projected increase in specific months.

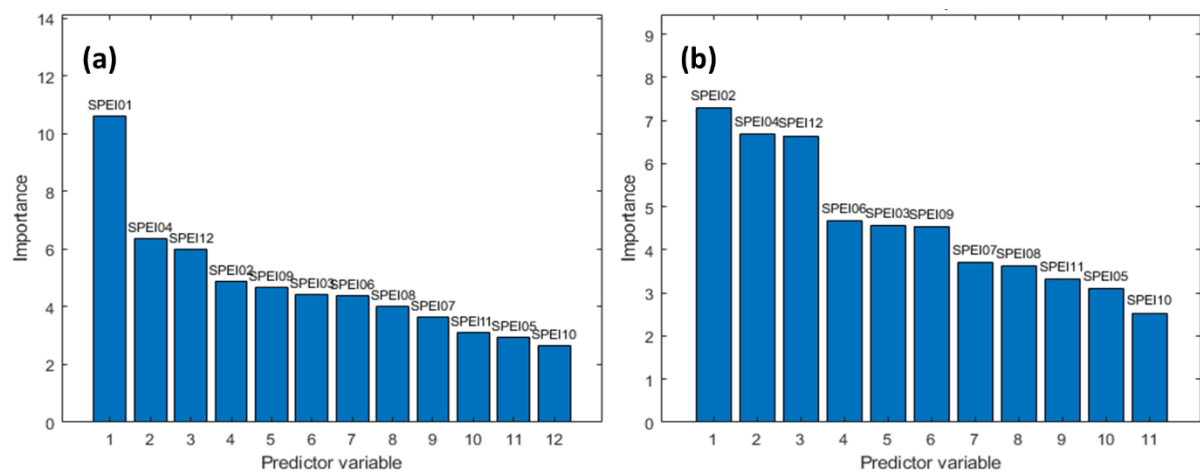

**Figure S4.** Estimates of feature importance, indicating of the more relevant predictors for the RF model: (a) with all SPEIs, (b) after removing SPEI-1.
